# Supplementary material
Source: publisher figshare collection journal article supplement (https://gsajournals.figshare.com/ndownloader/files/26510927)
Supplement: Supplementary file 1 [file 26510927]

## Sheet: Go Terms
Supplemetary Table 2. Go ontology terms assigned to the predicted proteomes of Nectriaceous fungi used in this study.
Neonectria faginata	CBS 134246 (A.R. 4307)			Neonectria coccinea	CBS119158 (G.J.S. 98-114)			Neonectria ditissima	CBS 226.31 (IMI 113922)			Corinectria fuckeliana	CBS125109 (G.J.S. 02-67)			Thelonectria rubi	CBS 177.27
GO Distribution by Level (2)				GO Distribution by Level (2)				GO Distribution by Level (2)				GO Distribution by Level (2)				GO Distribution by Level (2)
Biological Process				Biological Process				Biological Process				Biological Process				Biological Process
GO-id	GO-term	#Seqs		GO-id	GO-term	#Seqs		GO-id	GO-term	#Seqs		GO-id	GO-term	#Seqs		GO-id	GO-term	#Seqs
GO:0008152	metabolic process	4437		GO:0008152	metabolic process	4429		GO:0008152	metabolic process	4895		GO:0008152	metabolic process	3994		GO:0008152	metabolic process	3807
GO:0009987	cellular process	3398		GO:0009987	cellular process	3384		GO:0009987	cellular process	3660		GO:0009987	cellular process	3188		GO:0009987	cellular process	3014
GO:0051179	localization	1311		GO:0051179	localization	1303		GO:0051179	localization	1369		GO:0051179	localization	1137		GO:0051179	localization	1182
GO:0065007	biological regulation	1088		GO:0065007	biological regulation	1094		GO:0065007	biological regulation	1195		GO:0065007	biological regulation	1002		GO:0065007	biological regulation	939
GO:0071840	cellular component organization or biogenesis	640		GO:0071840	cellular component organization or biogenesis	639		GO:0071840	cellular component organization or biogenesis	660		GO:0071840	cellular component organization or biogenesis	643		GO:0071840	cellular component organization or biogenesis	601
GO:0050896	response to stimulus	447		GO:0050896	response to stimulus	441		GO:0050896	response to stimulus	467		GO:0050896	response to stimulus	448		GO:0050896	response to stimulus	411
GO:0023052	signaling	175		GO:0023052	signaling	171		GO:0023052	signaling	181		GO:0023052	signaling	173		GO:0023052	signaling	159
GO:0032502	developmental process	96		GO:0032502	developmental process	85		GO:0032502	developmental process	99		GO:0032502	developmental process	98		GO:0032502	developmental process	101
GO:0000003	reproduction	62		GO:0000003	reproduction	60		GO:0000003	reproduction	59		GO:0000003	reproduction	70		GO:0000003	reproduction	77
GO:0032501	multicellular organismal process	56		GO:0032501	multicellular organismal process	51		GO:0032501	multicellular organismal process	60		GO:0032501	multicellular organismal process	63		GO:0032501	multicellular organismal process	65
GO:0051704	multi-organism process	39		GO:0051704	multi-organism process	36		GO:0051704	multi-organism process	30		GO:0051704	multi-organism process	38		GO:0051704	multi-organism process	43
GO:0040007	growth	15		GO:0040007	growth	13		GO:0040007	growth	16		GO:0040007	growth	14		GO:0040007	growth	16
GO:0044419	interspecies interaction between organisms	13		GO:0044419	interspecies interaction between organisms	12		GO:0044419	interspecies interaction between organisms	13		GO:0044419	interspecies interaction between organisms	12		GO:0044419	interspecies interaction between organisms	7
GO:0002376	immune system process	13		GO:0002376	immune system process	10		GO:0002376	immune system process	14		GO:0002376	immune system process	12		GO:0002376	immune system process	12
GO:0040011	locomotion	12		GO:0040011	locomotion	9		GO:0040011	locomotion	11		GO:0040011	locomotion	11		GO:0040011	locomotion	13
GO:0008283	cell population proliferation	10		GO:0008283	cell population proliferation	9		GO:0008283	cell population proliferation	12		GO:0008283	cell population proliferation	12		GO:0008283	cell population proliferation	16
GO:0022610	biological adhesion	9		GO:0022610	biological adhesion	9		GO:0022610	biological adhesion	11		GO:0022610	biological adhesion	9		GO:0022610	biological adhesion	6
GO:0048511	rhythmic process	7		GO:0048511	rhythmic process	6		GO:0048511	rhythmic process	6		GO:0048511	rhythmic process	5		GO:0048511	rhythmic process	4
GO:0007610	behavior	7		GO:0007610	behavior	5		GO:0007610	behavior	5		GO:0007610	behavior	6		GO:0007610	behavior	11
GO:0019740	nitrogen utilization	5		GO:0019740	nitrogen utilization	4		GO:0019740	nitrogen utilization	4		GO:0019740	nitrogen utilization	4		GO:0019740	nitrogen utilization	5
GO:0051703	intraspecies interaction between organisms	3		GO:0051703	intraspecies interaction between organisms	3		GO:0051703	intraspecies interaction between organisms	4		GO:0051703	intraspecies interaction between organisms	2		GO:0051703	intraspecies interaction between organisms	2
GO:0015976	carbon utilization	1		GO:0015976	carbon utilization	1		GO:0015976	carbon utilization	1		GO:0015976	carbon utilization	2		GO:0015976	carbon utilization	1
GO:0110148	biomineralization	1		GO:0110148	biomineralization	2		GO:0110148	biomineralization	1		GO:0110148	biomineralization	1
GO:0098743	cell aggregation	1		GO:0098743	cell aggregation	2		GO:0098743	cell aggregation	1		GO:0098743	cell aggregation	1		GO:0098743	cell aggregation	1
	TOTAL	11846			TOTAL	11778			TOTAL	12774		GO:0001906	cell killing	1			TOTAL	10493
													TOTAL	6952
Molecular Function				Molecular Function				Molecular Function				Molecular Function				Molecular Function
GO-id	GO-term	#Seqs		GO-id	GO-term	#Seqs		GO-id	GO-term	#Seqs		GO-id	GO-term	#Seqs		GO-id	GO-term	#Seqs
GO:0003824	catalytic activity	4418		GO:0003824	catalytic activity	4386		GO:0003824	catalytic activity	4786		GO:0003824	catalytic activity	3935		GO:0003824	catalytic activity	3840
GO:0005488	binding	3495		GO:0005488	binding	3428		GO:0005488	binding	3779		GO:0005488	binding	3083		GO:0005488	binding	2986
GO:0005215	transporter activity	578		GO:0005215	transporter activity	593		GO:0005215	transporter activity	615		GO:0005215	transporter activity	504		GO:0005215	transporter activity	531
GO:0140110	transcription regulator activity	441		GO:0140110	transcription regulator activity	438		GO:0140110	transcription regulator activity	548		GO:0140110	transcription regulator activity	366		GO:0140110	transcription regulator activity	275
GO:0005198	structural molecule activity	191		GO:0005198	structural molecule activity	187		GO:0005198	structural molecule activity	198		GO:0005198	structural molecule activity	184		GO:0005198	structural molecule activity	180
GO:0098772	molecular function regulator	105		GO:0098772	molecular function regulator	100		GO:0098772	molecular function regulator	112		GO:0098772	molecular function regulator	105		GO:0098772	molecular function regulator	96
GO:0045182	translation regulator activity	103		GO:0045182	translation regulator activity	103		GO:0045182	translation regulator activity	102		GO:0045182	translation regulator activity	101		GO:0045182	translation regulator activity	97
GO:0016209	antioxidant activity	37		GO:0016209	antioxidant activity	38		GO:0016209	antioxidant activity	47		GO:0016209	antioxidant activity	33		GO:0016209	antioxidant activity	33
GO:0140299	small molecule sensor activity	14		GO:0140299	small molecule sensor activity	13		GO:0140299	small molecule sensor activity	14		GO:0140299	small molecule sensor activity	11		GO:0140299	small molecule sensor activity	10
GO:0060089	molecular transducer activity	14		GO:0060089	molecular transducer activity	17		GO:0060089	molecular transducer activity	14		GO:0060089	molecular transducer activity	13		GO:0060089	molecular transducer activity	12
GO:0045735	nutrient reservoir activity	7		GO:0045735	nutrient reservoir activity	7		GO:0045735	nutrient reservoir activity	7		GO:0045735	nutrient reservoir activity	5		GO:0045735	nutrient reservoir activity	10
GO:0031386	protein tag	3		GO:0031386	protein tag	3		GO:0031386	protein tag	3		GO:0031386	protein tag	3		GO:0031386	protein tag	3
GO:0140104	molecular carrier activity	3		GO:0140104	molecular carrier activity	3		GO:0140104	molecular carrier activity	4		GO:0140104	molecular carrier activity	3		GO:0140104	molecular carrier activity	3
	TOTAL	9409			TOTAL	9316			TOTAL	10229		GO:0090729	toxin activity	1
												GO:0044183	protein folding chaperone	1		GO:0044183	protein folding chaperone	1
													TOTAL	8348			TOTAL	8077
Cellular Component				Cellular Component				Cellular Component				Cellular Component				Cellular Component
GO-id	GO-term	#Seqs		GO-id	GO-term	#Seqs		GO-id	GO-term	#Seqs		GO-id	GO-term	#Seqs		GO-id	GO-term	#Seqs
GO:0110165	cellular anatomical entity	4766		GO:0110165	cellular anatomical entity	4750		GO:0110165	cellular anatomical entity	5153		GO:0110165	cellular anatomical entity	4241		GO:0110165	cellular anatomical entity	4132
GO:0005622	intracellular	2187		GO:0005622	intracellular	2151		GO:0005622	intracellular	2386		GO:0005622	intracellular	2055		GO:0005622	intracellular	1881
GO:0032991	protein-containing complex	833		GO:0032991	protein-containing complex	809		GO:0032991	protein-containing complex	851		GO:0032991	protein-containing complex	810		GO:0032991	protein-containing complex	763
GO:0005623	cell	81		GO:0005623	cell	84		GO:0005623	cell	84		GO:0005623	cell	79		GO:0005623	cell	76
	TOTAL	7867			TOTAL	7794			TOTAL	8474			TOTAL	7185			TOTAL	6852
